# Supplementary material for: Salmonella Bacterin Vaccination Decreases Shedding and Colonization of Salmonella Typhimurium in Pigs
Source: MDPI journal article supplement (doi:10.3390/microorganisms9061163), 2021-05-28
Supplement: s1 [file s1]

**Table S1.** Mean  $\pm$  standard deviation of the number of red blood cells ( $\times 10^6/\mu\text{L}$ ), hemoglobin content (g/dL), globular volume (%), mean corpuscular volume-MCV (fL), mean corpuscular hemoglobin-MCH (pg), mean corpuscular hemoglobin concentration-MCHC (g/dL), and the number of platelets ( $\times 10^3/\mu\text{L}$ ) of immunized (G1) and non-immunized (G2) groups with an inactivated vaccine against swine pneumoenteritis.

|         | Number of Red Blood Cells<br>( $\times 10^6/\mu\text{L}$ ) <sup>1</sup> |                              | Hemoglobin Content<br>(g/dL) <sup>1</sup> |                              | Globular Volume (%) <sup>1</sup> |                              | MCV (fL) <sup>1</sup>        |                              | MCH (pg) <sup>1</sup>        |                              | MCHC (g/dL) <sup>1</sup>     |                              | Number of Platelets<br>( $\times 10^3/\mu\text{L}$ ) <sup>1</sup> |                            |
|---------|-------------------------------------------------------------------------|------------------------------|-------------------------------------------|------------------------------|----------------------------------|------------------------------|------------------------------|------------------------------|------------------------------|------------------------------|------------------------------|------------------------------|-------------------------------------------------------------------|----------------------------|
| Moments | Groups                                                                  |                              | Groups                                    |                              | Groups                           |                              | Groups                       |                              | Groups                       |                              | Groups                       |                              | Groups                                                            |                            |
|         | G1                                                                      | G2                           | G1                                        | G2                           | G1                               | G2                           | G1                           | G2                           | G1                           | G2                           | G1                           | G2                           | G1                                                                | G2                         |
| D-42    | 6.72 $\pm$ 0.43 <sup>A</sup>                                            | 6.67 $\pm$ 0.76 <sup>A</sup> | 11.8 $\pm$ 1.37 <sup>A</sup>              | 12.3 $\pm$ 0.90 <sup>A</sup> | 35.8 $\pm$ 3.89 <sup>A</sup>     | 36.7 $\pm$ 2.52 <sup>A</sup> | 53.2 $\pm$ 3.81 <sup>A</sup> | 55.3 $\pm$ 3.62 <sup>B</sup> | 17.5 $\pm$ 1.35 <sup>A</sup> | 18.5 $\pm$ 1.27 <sup>B</sup> | 32.8 $\pm$ 0.72 <sup>A</sup> | 33.3 $\pm$ 0.69 <sup>B</sup> | 776 $\pm$ 264 <sup>A</sup>                                        | 691 $\pm$ 225 <sup>A</sup> |
| D-21    | 6.40 $\pm$ 0.35 <sup>A</sup>                                            | 6.38 $\pm$ 0.65 <sup>A</sup> | 10.7 $\pm$ 0.44 <sup>A</sup>              | 10.9 $\pm$ 0.90 <sup>A</sup> | 33.3 $\pm$ 1.53 <sup>A</sup>     | 33.2 $\pm$ 2.38 <sup>A</sup> | 52.1 $\pm$ 1.99 <sup>A</sup> | 52.2 $\pm$ 2.86 <sup>A</sup> | 16.7 $\pm$ 0.71 <sup>A</sup> | 17.1 $\pm$ 1.05 <sup>A</sup> | 32.1 $\pm$ 0.49 <sup>A</sup> | 32.8 $\pm$ 0.87 <sup>B</sup> | 664 $\pm$ 159 <sup>A</sup>                                        | 603 $\pm$ 201 <sup>A</sup> |
| D0      | 7.00 $\pm$ 0.50 <sup>A</sup>                                            | 6.86 $\pm$ 0.70 <sup>A</sup> | 11.7 $\pm$ 0.74 <sup>A</sup>              | 11.6 $\pm$ 0.95 <sup>A</sup> | 36.4 $\pm$ 2.29 <sup>A</sup>     | 35.8 $\pm$ 3.05 <sup>A</sup> | 52.0 $\pm$ 2.26 <sup>A</sup> | 52.2 $\pm$ 2.86 <sup>A</sup> | 16.7 $\pm$ 0.76 <sup>A</sup> | 17.0 $\pm$ 1.04 <sup>A</sup> | 32.1 $\pm$ 0.58 <sup>A</sup> | 32.5 $\pm$ 0.92 <sup>A</sup> | 612 $\pm$ 150 <sup>A</sup>                                        | 551 $\pm$ 131 <sup>A</sup> |
| D3      | 6.97 $\pm$ 0.55 <sup>A</sup>                                            | 6.73 $\pm$ 0.75 <sup>A</sup> | 11.5 $\pm$ 0.82 <sup>A</sup>              | 11.2 $\pm$ 1.07 <sup>A</sup> | 35.9 $\pm$ 2.58 <sup>A</sup>     | 34.7 $\pm$ 3.17 <sup>A</sup> | 51.6 $\pm$ 2.17 <sup>A</sup> | 51.7 $\pm$ 2.87 <sup>A</sup> | 16.6 $\pm$ 0.76 <sup>A</sup> | 16.7 $\pm$ 1.02 <sup>A</sup> | 32.1 $\pm$ 0.45 <sup>A</sup> | 32.4 $\pm$ 0.55 <sup>A</sup> | 607 $\pm$ 150 <sup>A</sup>                                        | 549 $\pm$ 138 <sup>A</sup> |
| D6      | 6.88 $\pm$ 0.54 <sup>A</sup>                                            | 6.82 $\pm$ 0.77 <sup>A</sup> | 11.5 $\pm$ 0.84 <sup>A</sup>              | 11.4 $\pm$ 1.04 <sup>A</sup> | 35.6 $\pm$ 2.64 <sup>A</sup>     | 35.2 $\pm$ 3.12 <sup>A</sup> | 51.7 $\pm$ 2.22 <sup>A</sup> | 51.8 $\pm$ 2.88 <sup>A</sup> | 16.7 $\pm$ 0.80 <sup>A</sup> | 16.8 $\pm$ 1.02 <sup>A</sup> | 32.3 $\pm$ 0.48 <sup>A</sup> | 32.4 $\pm$ 0.60 <sup>A</sup> | 605 $\pm$ 163 <sup>A</sup>                                        | 609 $\pm$ 187 <sup>A</sup> |
| D9      | 6.74 $\pm$ 0.49 <sup>A</sup>                                            | 6.57 $\pm$ 0.76 <sup>A</sup> | 11.5 $\pm$ 0.69 <sup>A</sup>              | 11.2 $\pm$ 1.23 <sup>A</sup> | 35.5 $\pm$ 2.23 <sup>A</sup>     | 34.4 $\pm$ 3.68 <sup>A</sup> | 52.7 $\pm$ 2.17 <sup>A</sup> | 52.5 $\pm$ 2.94 <sup>A</sup> | 17.0 $\pm$ 0.74 <sup>A</sup> | 17.1 $\pm$ 1.02 <sup>A</sup> | 32.4 $\pm$ 0.43 <sup>A</sup> | 32.6 $\pm$ 0.73 <sup>A</sup> | 548 $\pm$ 132 <sup>A</sup>                                        | 493 $\pm$ 147 <sup>A</sup> |
| D12     | 6.67 $\pm$ 0.48 <sup>A</sup>                                            | 6.75 $\pm$ 0.58 <sup>A</sup> | 11.6 $\pm$ 0.67 <sup>A</sup>              | 11.8 $\pm$ 0.78 <sup>A</sup> | 35.5 $\pm$ 1.97 <sup>A</sup>     | 36.1 $\pm$ 2.49 <sup>A</sup> | 53.4 $\pm$ 2.05 <sup>A</sup> | 53.5 $\pm$ 3.06 <sup>A</sup> | 17.5 $\pm$ 0.72 <sup>A</sup> | 17.5 $\pm$ 1.10 <sup>A</sup> | 32.7 $\pm$ 0.38 <sup>A</sup> | 32.6 $\pm$ 0.72 <sup>A</sup> | 507 $\pm$ 116 <sup>A</sup>                                        | 506 $\pm$ 106 <sup>A</sup> |
| D15     | 6.74 $\pm$ 0.71 <sup>A</sup>                                            | 6.71 $\pm$ 0.55 <sup>A</sup> | 11.9 $\pm$ 1.23 <sup>A</sup>              | 11.8 $\pm$ 0.71 <sup>A</sup> | 36.2 $\pm$ 3.73 <sup>A</sup>     | 35.9 $\pm$ 2.33 <sup>A</sup> | 53.8 $\pm$ 2.04 <sup>A</sup> | 53.6 $\pm$ 3.04 <sup>A</sup> | 17.7 $\pm$ 0.76 <sup>A</sup> | 17.7 $\pm$ 1.05 <sup>A</sup> | 32.9 $\pm$ 0.28 <sup>A</sup> | 33.0 $\pm$ 0.42 <sup>A</sup> | 483 $\pm$ 95.0 <sup>A</sup>                                       | 489 $\pm$ 114 <sup>A</sup> |
| D18     | 6.95 $\pm$ 0.55 <sup>A</sup>                                            | 6.73 $\pm$ 0.56 <sup>A</sup> | 12.3 $\pm$ 0.58 <sup>A</sup>              | 11.9 $\pm$ 0.79 <sup>A</sup> | 37.2 $\pm$ 1.85 <sup>A</sup>     | 36.1 $\pm$ 2.43 <sup>A</sup> | 53.7 $\pm$ 2.01 <sup>A</sup> | 53.7 $\pm$ 3.00 <sup>A</sup> | 17.7 $\pm$ 0.80 <sup>A</sup> | 17.7 $\pm$ 1.15 <sup>A</sup> | 32.9 $\pm$ 0.49 <sup>A</sup> | 33.0 $\pm$ 0.66 <sup>A</sup> | 496 $\pm$ 126 <sup>A</sup>                                        | 454 $\pm$ 139 <sup>A</sup> |
| D21     | 6.97 $\pm$ 0.59 <sup>A</sup>                                            | 6.72 $\pm$ 0.55 <sup>A</sup> | 12.3 $\pm$ 0.90 <sup>A</sup>              | 11.8 $\pm$ 0.97 <sup>A</sup> | 37.1 $\pm$ 2.91 <sup>A</sup>     | 36.0 $\pm$ 3.19 <sup>A</sup> | 53.3 $\pm$ 2.26 <sup>A</sup> | 53.6 $\pm$ 2.09 <sup>A</sup> | 17.6 $\pm$ 0.83 <sup>A</sup> | 17.6 $\pm$ 0.66 <sup>A</sup> | 33.0 $\pm$ 0.30 <sup>A</sup> | 32.9 $\pm$ 0.63 <sup>A</sup> | 512 $\pm$ 151 <sup>A</sup>                                        | 516 $\pm$ 154 <sup>A</sup> |
| D24     | 7.08 $\pm$ 0.61 <sup>A</sup>                                            | 7.00 $\pm$ 0.48 <sup>A</sup> | 12.3 $\pm$ 0.82 <sup>A</sup>              | 12.2 $\pm$ 0.91 <sup>A</sup> | 38.3 $\pm$ 2.71 <sup>A</sup>     | 37.6 $\pm$ 2.82 <sup>A</sup> | 54.3 $\pm$ 2.14 <sup>A</sup> | 53.8 $\pm$ 2.34 <sup>A</sup> | 17.4 $\pm$ 0.78 <sup>A</sup> | 17.5 $\pm$ 0.69 <sup>A</sup> | 32.1 $\pm$ 0.50 <sup>A</sup> | 32.5 $\pm$ 0.52 <sup>A</sup> | 594 $\pm$ 160 <sup>A</sup>                                        | 570 $\pm$ 233 <sup>A</sup> |
| D27     | 7.23 $\pm$ 0.52 <sup>A</sup>                                            | 7.02 $\pm$ 0.49 <sup>A</sup> | 12.5 $\pm$ 0.66 <sup>A</sup>              | 12.2 $\pm$ 0.98 <sup>A</sup> | 38.5 $\pm$ 2.14 <sup>A</sup>     | 37.2 $\pm$ 2.91 <sup>A</sup> | 53.3 $\pm$ 2.07 <sup>A</sup> | 53.0 $\pm$ 1.94 <sup>A</sup> | 17.4 $\pm$ 0.82 <sup>A</sup> | 17.4 $\pm$ 0.63 <sup>A</sup> | 32.6 $\pm$ 0.44 <sup>A</sup> | 32.8 $\pm$ 0.50 <sup>A</sup> | 643 $\pm$ 228 <sup>A</sup>                                        | 645 $\pm$ 169 <sup>A</sup> |
| D30     | 6.87 $\pm$ 0.60 <sup>A</sup>                                            | 6.80 $\pm$ 0.51 <sup>A</sup> | 11.9 $\pm$ 0.70 <sup>A</sup>              | 11.8 $\pm$ 0.87 <sup>A</sup> | 35.6 $\pm$ 2.09 <sup>A</sup>     | 35.2 $\pm$ 2.62 <sup>A</sup> | 52.0 $\pm$ 2.02 <sup>A</sup> | 51.9 $\pm$ 2.15 <sup>A</sup> | 17.3 $\pm$ 0.74 <sup>A</sup> | 17.3 $\pm$ 0.61 <sup>A</sup> | 33.3 $\pm$ 0.45 <sup>A</sup> | 33.4 $\pm$ 0.63 <sup>A</sup> | 603 $\pm$ 185 <sup>A</sup>                                        | 609 $\pm$ 163 <sup>A</sup> |
| D33     | 7.07 $\pm$ 0.53 <sup>A</sup>                                            | 6.69 $\pm$ 0.68 <sup>A</sup> | 11.1 $\pm$ 0.72 <sup>A</sup>              | 11.5 $\pm$ 0.97 <sup>A</sup> | 37.4 $\pm$ 2.22 <sup>A</sup>     | 35.7 $\pm$ 2.65 <sup>A</sup> | 53.0 $\pm$ 1.48 <sup>A</sup> | 53.6 $\pm$ 1.84 <sup>A</sup> | 17.4 $\pm$ 0.55 <sup>A</sup> | 17.3 $\pm$ 0.68 <sup>A</sup> | 32.7 $\pm$ 0.13 <sup>A</sup> | 32.3 $\pm$ 0.65 <sup>A</sup> | 440 $\pm$ 37.7 <sup>A</sup>                                       | 531 $\pm$ 116 <sup>A</sup> |
| D36     | 6.87 $\pm$ 0.41 <sup>A</sup>                                            | 6.65 $\pm$ 0.64 <sup>A</sup> | 12.5 $\pm$ 0.50 <sup>A</sup>              | 11.0 $\pm$ 0.95 <sup>A</sup> | 35.9 $\pm$ 1.45 <sup>A</sup>     | 35.4 $\pm$ 2.64 <sup>A</sup> | 52.3 $\pm$ 1.27 <sup>A</sup> | 53.3 $\pm$ 1.78 <sup>A</sup> | 16.2 $\pm$ 0.39 <sup>A</sup> | 16.5 $\pm$ 0.45 <sup>A</sup> | 31.0 $\pm$ 0.33 <sup>A</sup> | 31.0 $\pm$ 0.92 <sup>A</sup> | 445 $\pm$ 82.4 <sup>A</sup>                                       | 546 $\pm$ 106 <sup>A</sup> |
| D39     | 7.26 $\pm$ 0.49 <sup>A</sup>                                            | 6.80 $\pm$ 0.65 <sup>A</sup> | 12.4 $\pm$ 0.72 <sup>A</sup>              | 11.8 $\pm$ 0.90 <sup>A</sup> | 37.9 $\pm$ 2.20 <sup>A</sup>     | 35.8 $\pm$ 2.53 <sup>A</sup> | 52.3 $\pm$ 0.97 <sup>A</sup> | 52.7 $\pm$ 1.87 <sup>A</sup> | 17.3 $\pm$ 0.38 <sup>A</sup> | 17.4 $\pm$ 0.50 <sup>A</sup> | 33.0 $\pm$ 0.36 <sup>A</sup> | 33.0 $\pm$ 0.46 <sup>A</sup> | 442 $\pm$ 82.3 <sup>A</sup>                                       | 539 $\pm$ 125 <sup>A</sup> |

<sup>1</sup> Means followed by the same letter on the line do not differ by Student's *t*-test ( $p > 0.05$ ).

**Table S2.** Mean  $\pm$  standard deviation of the number of leukocytes ( $\times 10^3/\mu\text{L}$ ), basophils (cells/ $\mu\text{L}$ ), eosinophils (cells/ $\mu\text{L}$ ), neutrophil rods (cells/ $\mu\text{L}$ ), segmented neutrophils (cells/ $\mu\text{L}$ ), lymphocytes (cells/ $\mu\text{L}$ ), and monocytes (cells/ $\mu\text{L}$ ) of immunized (G1) and non-immunized (G2) groups with the inactivated vaccine against swine pneumoenteritis.

|         | Leukocytes<br>( $\times 10^3/\mu\text{L}$ ) <sup>1</sup> |                              | Basophils<br>(cells/ $\mu\text{L}$ ) <sup>2</sup> |                              | Eosinophils (cells/ $\mu\text{L}$ ) <sup>2</sup> |                            | Neutrophils Sticks (cells/ $\mu\text{L}$ ) <sup>2</sup> |                              | Segmented Neutrophils<br>(cells/ $\mu\text{L}$ ) <sup>1</sup> |                                 | Lymphocytes<br>(cells/ $\mu\text{L}$ ) <sup>1</sup> |                                 | Monocytes<br>(cells/ $\mu\text{L}$ ) <sup>2</sup> |                            |
|---------|----------------------------------------------------------|------------------------------|---------------------------------------------------|------------------------------|--------------------------------------------------|----------------------------|---------------------------------------------------------|------------------------------|---------------------------------------------------------------|---------------------------------|-----------------------------------------------------|---------------------------------|---------------------------------------------------|----------------------------|
| Moments | Groups                                                   |                              | Groups                                            |                              | Groups                                           |                            | Groups                                                  |                              | Groups                                                        |                                 | Groups                                              |                                 | Groups                                            |                            |
|         | G1                                                       | G2                           | G1                                                | G2                           | G1                                               | G2                         | G1                                                      | G2                           | G1                                                            | G2                              | G1                                                  | G2                              | G1                                                | G2                         |
| D-42    | 21.3 $\pm$ 5.39 <sup>A</sup>                             | 24.5 $\pm$ 5.90 <sup>A</sup> | 0 $\pm$ 0                                         | 0 $\pm$ 0                    | 257 $\pm$ 179 <sup>A</sup>                       | 428 $\pm$ 261 <sup>A</sup> | 41.7 $\pm$ 103                                          | 0 $\pm$ 0                    | 9.967 $\pm$ 4.063 <sup>A</sup>                                | 11.753 $\pm$ 3.840 <sup>A</sup> | 10.824 $\pm$ 2.210 <sup>A</sup>                     | 11.944 $\pm$ 2.700 <sup>A</sup> | 252 $\pm$ 106 <sup>A</sup>                        | 380 $\pm$ 238 <sup>B</sup> |
| D-21    | 19.4 $\pm$ 6.45 <sup>A</sup>                             | 20.4 $\pm$ 4.70 <sup>A</sup> | 0 $\pm$ 0                                         | 0 $\pm$ 0                    | 128 $\pm$ 142 <sup>A</sup>                       | 140 $\pm$ 179 <sup>A</sup> | 0 $\pm$ 0                                               | 0 $\pm$ 0                    | 8.656 $\pm$ 4.491 <sup>A</sup>                                | 8.379 $\pm$ 3.005 <sup>A</sup>  | 10.374 $\pm$ 2.968 <sup>A</sup>                     | 11.028 $\pm$ 2.918 <sup>A</sup> | 231 $\pm$ 141 <sup>A</sup>                        | 248 $\pm$ 107 <sup>A</sup> |
| D0      | 20.5 $\pm$ 5.53 <sup>A</sup>                             | 20.4 $\pm$ 4.47 <sup>A</sup> | 0 $\pm$ 0                                         | 0 $\pm$ 0                    | 271 $\pm$ 255 <sup>A</sup>                       | 521 $\pm$ 347 <sup>B</sup> | 13.2 $\pm$ 58.8 <sup>A</sup>                            | 75.2 $\pm$ 179 <sup>A</sup>  | 8.057 $\pm$ 4.259 <sup>A</sup>                                | 6.975 $\pm$ 2.867 <sup>A</sup>  | 11.953 $\pm$ 2.983 <sup>A</sup>                     | 12.642 $\pm$ 2.891 <sup>A</sup> | 250 $\pm$ 84.7 <sup>A</sup>                       | 211 $\pm$ 135 <sup>A</sup> |
| D3      | 19.8 $\pm$ 4.51 <sup>A</sup>                             | 22.9 $\pm$ 5.61 <sup>A</sup> | 26.3 $\pm$ 86.5                                   | 0 $\pm$ 0                    | 381 $\pm$ 215 <sup>A</sup>                       | 364 $\pm$ 434 <sup>A</sup> | 222 $\pm$ 190 <sup>A</sup>                              | 416 $\pm$ 516 <sup>A</sup>   | 6.987 $\pm$ 2.614 <sup>A</sup>                                | 8.462 $\pm$ 4.435 <sup>A</sup>  | 11.638 $\pm$ 2.653 <sup>A</sup>                     | 13.205 $\pm$ 2.770 <sup>A</sup> | 526 $\pm$ 375 <sup>A</sup>                        | 413 $\pm$ 702 <sup>B</sup> |
| D6      | 18.7 $\pm$ 4.13 <sup>A</sup>                             | 24.0 $\pm$ 5.04 <sup>B</sup> | 51.9 $\pm$ 82.1 <sup>A</sup>                      | 47.7 $\pm$ 100 <sup>A</sup>  | 320 $\pm$ 286 <sup>A</sup>                       | 582 $\pm$ 656 <sup>A</sup> | 210 $\pm$ 183 <sup>A</sup>                              | 416 $\pm$ 516 <sup>A</sup>   | 6.348 $\pm$ 2.879 <sup>A</sup>                                | 8.387 $\pm$ 2.773 <sup>A</sup>  | 11.289 $\pm$ 2.659 <sup>A</sup>                     | 14.139 $\pm$ 3.462 <sup>B</sup> | 485 $\pm$ 420 <sup>A</sup>                        | 377 $\pm$ 366 <sup>A</sup> |
| D9      | 19.3 $\pm$ 4.88 <sup>A</sup>                             | 22.7 $\pm$ 4.10 <sup>A</sup> | 64.2 $\pm$ 107 <sup>A</sup>                       | 69.2 $\pm$ 128 <sup>A</sup>  | 300 $\pm$ 234 <sup>A</sup>                       | 510 $\pm$ 427 <sup>A</sup> | 143 $\pm$ 184 <sup>A</sup>                              | 235 $\pm$ 286 <sup>A</sup>   | 8.075 $\pm$ 3.733 <sup>A</sup>                                | 8.970 $\pm$ 2.721 <sup>A</sup>  | 10.522 $\pm$ 2.808 <sup>A</sup>                     | 12.699 $\pm$ 2.506 <sup>A</sup> | 177 $\pm$ 185 <sup>A</sup>                        | 192 $\pm$ 194 <sup>A</sup> |
| D12     | 17.1 $\pm$ 2.44 <sup>A</sup>                             | 22.0 $\pm$ 6.00 <sup>A</sup> | 20.2 $\pm$ 53.3 <sup>A</sup>                      | 27.2 $\pm$ 105 <sup>A</sup>  | 324 $\pm$ 320 <sup>A</sup>                       | 459 $\pm$ 349 <sup>A</sup> | 159 $\pm$ 214 <sup>A</sup>                              | 384 $\pm$ 226 <sup>B</sup>   | 6.529 $\pm$ 1.714 <sup>A</sup>                                | 7.958 $\pm$ 3.812 <sup>A</sup>  | 9.828 $\pm$ 1.865 <sup>A</sup>                      | 12.662 $\pm$ 3.264 <sup>B</sup> | 261 $\pm$ 253 <sup>A</sup>                        | 491 $\pm$ 365 <sup>A</sup> |
| D15     | 14.7 $\pm$ 2.23 <sup>A</sup>                             | 18.6 $\pm$ 3.37 <sup>A</sup> | 85.0 $\pm$ 138 <sup>A</sup>                       | 66.1 $\pm$ 117 <sup>A</sup>  | 326 $\pm$ 260 <sup>A</sup>                       | 362 $\pm$ 241 <sup>A</sup> | 76.3 $\pm$ 104 <sup>A</sup>                             | 95.7 $\pm$ 132 <sup>A</sup>  | 4.450 $\pm$ 1.529 <sup>A</sup>                                | 6.159 $\pm$ 1.893 <sup>A</sup>  | 9.574 $\pm$ 1.668 <sup>A</sup>                      | 11.587 $\pm$ 3.033 <sup>A</sup> | 178 $\pm$ 134 <sup>A</sup>                        | 344 $\pm$ 289 <sup>A</sup> |
| D18     | 13.9 $\pm$ 2.43 <sup>A</sup>                             | 17.0 $\pm$ 3.40 <sup>A</sup> | 33.7 $\pm$ 58.0 <sup>A</sup>                      | 72.9 $\pm$ 119 <sup>A</sup>  | 288 $\pm$ 186 <sup>A</sup>                       | 361 $\pm$ 251 <sup>A</sup> | 86.8 $\pm$ 77.4 <sup>A</sup>                            | 128 $\pm$ 149 <sup>A</sup>   | 3.804 $\pm$ 1.373 <sup>A</sup>                                | 4.640 $\pm$ 1.767 <sup>A</sup>  | 9.474 $\pm$ 2.182 <sup>A</sup>                      | 11.474 $\pm$ 2.303 <sup>A</sup> | 227 $\pm$ 155 <sup>A</sup>                        | 278 $\pm$ 215 <sup>A</sup> |
| D21     | 13.6 $\pm$ 3.34 <sup>A</sup>                             | 17.6 $\pm$ 4.40 <sup>A</sup> | 30.5 $\pm$ 66.6 <sup>A</sup>                      | 12.9 $\pm$ 40.8 <sup>A</sup> | 163 $\pm$ 106 <sup>A</sup>                       | 338 $\pm$ 221 <sup>A</sup> | 74.1 $\pm$ 86.7 <sup>A</sup>                            | 389 $\pm$ 546 <sup>A</sup>   | 3.896 $\pm$ 1.862 <sup>A</sup>                                | 5.412 $\pm$ 2.459 <sup>A</sup>  | 8.611 $\pm$ 1.745 <sup>A</sup>                      | 11.139 $\pm$ 2.373 <sup>A</sup> | 186 $\pm$ 143 <sup>A</sup>                        | 309 $\pm$ 302 <sup>A</sup> |
| D24     | 17.5 $\pm$ 5.05 <sup>A</sup>                             | 20.6 $\pm$ 4.41 <sup>A</sup> | 59.9 $\pm$ 80.5 <sup>A</sup>                      | 178 $\pm$ 172 <sup>A</sup>   | 343 $\pm$ 445 <sup>A</sup>                       | 448 $\pm$ 319 <sup>A</sup> | 58.8 $\pm$ 78.0 <sup>A</sup>                            | 92.6 $\pm$ 121 <sup>A</sup>  | 4.776 $\pm$ 2.460 <sup>A</sup>                                | 4.974 $\pm$ 2.165 <sup>A</sup>  | 11.541 $\pm$ 3.681 <sup>A</sup>                     | 14.721 $\pm$ 3.409 <sup>A</sup> | 161 $\pm$ 128 <sup>A</sup>                        | 216 $\pm$ 168 <sup>A</sup> |
| D27     | 17.6 $\pm$ 3.47 <sup>A</sup>                             | 19.4 $\pm$ 4.19 <sup>A</sup> | 45.8 $\pm$ 74.5 <sup>A</sup>                      | 66.0 $\pm$ 107 <sup>A</sup>  | 310 $\pm$ 241 <sup>A</sup>                       | 348 $\pm$ 234 <sup>A</sup> | 61.5 $\pm$ 101 <sup>A</sup>                             | 88.9 $\pm$ 160 <sup>A</sup>  | 4.438 $\pm$ 1.743 <sup>A</sup>                                | 5.207 $\pm$ 1.710 <sup>A</sup>  | 11.841 $\pm$ 2.588 <sup>A</sup>                     | 13.325 $\pm$ 3.398 <sup>A</sup> | 265 $\pm$ 181 <sup>A</sup>                        | 385 $\pm$ 269 <sup>A</sup> |
| D30     | 20.0 $\pm$ 4.82 <sup>A</sup>                             | 20.7 $\pm$ 5.34 <sup>A</sup> | 120 $\pm$ 199 <sup>A</sup>                        | 192 $\pm$ 273 <sup>A</sup>   | 279 $\pm$ 286 <sup>A</sup>                       | 273 $\pm$ 325 <sup>A</sup> | 69.4 $\pm$ 113 <sup>A</sup>                             | 102 $\pm$ 135 <sup>A</sup>   | 6.607 $\pm$ 3.060 <sup>A</sup>                                | 6.791 $\pm$ 2.074 <sup>A</sup>  | 11.731 $\pm$ 2.773 <sup>A</sup>                     | 12.894 $\pm$ 3.161 <sup>A</sup> | 453 $\pm$ 241 <sup>A</sup>                        | 488 $\pm$ 309 <sup>A</sup> |
| D33     | 18.9 $\pm$ 5.57 <sup>A</sup>                             | 22.2 $\pm$ 9.41 <sup>A</sup> | 143 $\pm$ 209 <sup>A</sup>                        | 157 $\pm$ 215 <sup>A</sup>   | 340 $\pm$ 391 <sup>A</sup>                       | 331 $\pm$ 176 <sup>A</sup> | 437 $\pm$ 398 <sup>A</sup>                              | 487 $\pm$ 168 <sup>A</sup>   | 9.013 $\pm$ 3.024 <sup>A</sup>                                | 8.229 $\pm$ 3.392 <sup>A</sup>  | 8.611 $\pm$ 3.575 <sup>A</sup>                      | 7.872 $\pm$ 2.667 <sup>A</sup>  | 316 $\pm$ 287 <sup>A</sup>                        | 283 $\pm$ 348 <sup>A</sup> |
| D36     | 18.5 $\pm$ 4.39 <sup>A</sup>                             | 23.2 $\pm$ 6.54 <sup>A</sup> | 46.4 $\pm$ 104 <sup>A</sup>                       | 139 $\pm$ 196 <sup>A</sup>   | 471 $\pm$ 297 <sup>A</sup>                       | 313 $\pm$ 359 <sup>A</sup> | 96.6 $\pm$ 154 <sup>A</sup>                             | 154 $\pm$ 247 <sup>A</sup>   | 6.074 $\pm$ 2.103 <sup>A</sup>                                | 7.055 $\pm$ 3.015 <sup>A</sup>  | 11.525 $\pm$ 4.353 <sup>A</sup>                     | 12.419 $\pm$ 5.245 <sup>A</sup> | 266 $\pm$ 322 <sup>A</sup>                        | 359 $\pm$ 252 <sup>A</sup> |
| D39     | 18.1 $\pm$ 3.42 <sup>A</sup>                             | 22.2 $\pm$ 6.13 <sup>A</sup> | 69.2 $\pm$ 95.9 <sup>A</sup>                      | 160 $\pm$ 165 <sup>A</sup>   | 422 $\pm$ 335 <sup>A</sup>                       | 415 $\pm$ 251 <sup>A</sup> | 38.8 $\pm$ 86.8 <sup>A</sup>                            | 29.2 $\pm$ 65.3 <sup>A</sup> | 5.096 $\pm$ 2.597 <sup>A</sup>                                | 5.043 $\pm$ 2.187 <sup>A</sup>  | 12.170 $\pm$ 1.675 <sup>A</sup>                     | 13.923 $\pm$ 5.539 <sup>A</sup> | 284 $\pm$ 231 <sup>A</sup>                        | 268 $\pm$ 265 <sup>A</sup> |

<sup>1</sup> Means followed by the same letter on the line do not differ by Student's *t*-test ( $p > 0.05$ ). <sup>2</sup> Means followed by the same letter on the line do not differ from each other by the Mann-Whitney test ( $p > 0.05$ ).

**Table S3.** Percentage of rectal swabs positive for *Salmonella* Typhimurium in immunized (G1) and non-immunized (G2) groups with the inactivated vaccine against swine pneumoenteritis.

| Time Point | Groups            |         |                   |         |
|------------|-------------------|---------|-------------------|---------|
|            | G1                |         | G2                |         |
| D-42       | 0.0               | (0/20)  | 0.0               | (0/20)  |
| D-21       | 0.0               | (0/20)  | 0.0               | (0/20)  |
| D0         | 0.0               | (0/20)  | 0.0               | (0/20)  |
| D3         | 35.0 <sup>A</sup> | (7/20)  | 70.0 <sup>B</sup> | (14/20) |
| D6         | 50.0 <sup>A</sup> | (10/20) | 75.0 <sup>A</sup> | (15/20) |
| D9         | 35.0 <sup>A</sup> | (7/20)  | 55.0 <sup>A</sup> | (11/20) |
| D12        | 40.0 <sup>A</sup> | (6/15)  | 46.7 <sup>A</sup> | (7/15)  |
| D15        | 33.3 <sup>A</sup> | (5/15)  | 53.3 <sup>A</sup> | (8/15)  |
| D18        | 6.67 <sup>A</sup> | (1/15)  | 13.3 <sup>A</sup> | (2/15)  |
| D21        | 20.0 <sup>A</sup> | (2/10)  | 30.0 <sup>A</sup> | (3/10)  |
| D24        | 0.00 <sup>A</sup> | (0/10)  | 20.0 <sup>A</sup> | (2/10)  |
| D27        | 10.0 <sup>A</sup> | (1/10)  | 20.0 <sup>A</sup> | (2/10)  |
| D30        | 30.0 <sup>A</sup> | (3/10)  | 40.0 <sup>A</sup> | (4/10)  |
| D33        | 0.00 <sup>A</sup> | (0/5)   | 40.0 <sup>A</sup> | (2/5)   |
| D36        | 0.0               | (0/5)   | 0.0               | (0/5)   |
| D39        | 0.0               | (0/5)   | 0.0               | (0/5)   |

Values followed by the same letter on the line do not differ by the chi-square test or Fisher's exact test ( $p > 0.05$ ).

**Table S4.** Rectal swabs samples positive for *Salmonella* Typhimurium, according to the consistency of feces, in immunized (G1) and non-immunized (G2) groups with the inactivated vaccine against swine pneumoenteritis.

|    | Timepoint    | With Diarrhea |                         | Without Diarrhea |                         | Total         |                         |
|----|--------------|---------------|-------------------------|------------------|-------------------------|---------------|-------------------------|
|    |              | +/Total       | %                       | +/Total          | %                       | +/Total       | %                       |
| G1 | D-42         | 0/0           | 0.0                     | 0/20             | 0.0                     | 0/20          | 0.0                     |
|    | D-21         | 0/1           | 0.0                     | 0/19             | 0.0                     | 0/20          | 0.0                     |
|    | D0           | 0/0           | 0.0                     | 0/20             | 0.0                     | 0/20          | 0.0                     |
|    | D3           | 5/12          | 41.7                    | 2/8              | 25.0                    | 7/20          | 35.0                    |
|    | D6           | 4/7           | 57.1                    | 6/13             | 46.2                    | 10/20         | 50.0                    |
|    | D9           | 4/9           | 44.4                    | 3/11             | 27.3                    | 7/20          | 35.0                    |
|    | D12          | 1/3           | 33.3                    | 5/12             | 41.7                    | 6/15          | 40.0                    |
|    | D15          | 1/1           | 100                     | 4/14             | 28.6                    | 5/15          | 33.3                    |
|    | D18          | 0/2           | 0.0                     | 1/13             | 7.69                    | 1/15          | 6.67                    |
|    | D21          | 1/6           | 16.7                    | 1/4              | 25.0                    | 2/10          | 20.0                    |
|    | D24          | 0/0           | 0.0                     | 0/10             | 0.0                     | 0/10          | 0.0                     |
|    | D27          | 0/3           | 0.0                     | 1/7              | 14.3                    | 1/10          | 10.0                    |
|    | D30          | 1/2           | 50.0                    | 2/8              | 25.0                    | 3/10          | 30.0                    |
|    | D33          | 0/0           | 0.0                     | 0/5              | 0.0                     | 0/5           | 0.0                     |
|    | D36          | 0/0           | 0.0                     | 0/5              | 0.0                     | 0/5           | 0.0                     |
|    | D39          | 0/0           | 0.0                     | 0/5              | 0.0                     | 0/5           | 0.0                     |
|    | <b>Total</b> | <b>17/46</b>  | <b>40.0<sup>A</sup></b> | <b>25/174</b>    | <b>14.4<sup>A</sup></b> | <b>42/220</b> | <b>19.1<sup>A</sup></b> |
| G2 | D-42         | 0/0           | 0.0                     | 0/20             | 0.0                     | 0/20          | 0.0                     |
|    | D-21         | 0/0           | 0.0                     | 0/20             | 0.0                     | 0/20          | 0.0                     |
|    | D0           | 0/0           | 0.0                     | 0/20             | 0.0                     | 0/20          | 0.0                     |
|    | D3           | 11/16         | 68.8                    | 3/4              | 75.0                    | 14/20         | 70.0                    |
|    | D6           | 10/13         | 76.9                    | 5/7              | 71.4                    | 15/20         | 75.0                    |
|    | D9           | 7/11          | 63.3                    | 4/9              | 44.4                    | 11/20         | 55.0                    |
|    | D12          | 6/7           | 85.7                    | 1/8              | 12.5                    | 7/15          | 46.7                    |
|    | D15          | 1/1           | 100                     | 7/14             | 50.0                    | 8/15          | 53.3                    |
|    | D18          | 0/0           | 0.0                     | 2/15             | 13.3                    | 2/15          | 13.3                    |
|    | D21          | 3/3           | 100                     | 0/7              | 0.0                     | 3/10          | 30.0                    |
|    | D24          | 1/1           | 100                     | 1/9              | 11.1                    | 2/10          | 20.0                    |
|    | D27          | 0/3           | 0.0                     | 2/7              | 28.6                    | 2/10          | 20.0                    |
|    | D30          | 1/1           | 100                     | 3/9              | 33.3                    | 4/10          | 40.0                    |
|    | D33          | 1/2           | 50.0                    | 1/3              | 33.3                    | 2/5           | 40.0                    |
|    | D36          | 0/0           | 0.0                     | 0/5              | 0.0                     | 0/5           | 0.0                     |
|    | D39          | 0/0           | 0.0                     | 0/5              | 0.0                     | 0/5           | 0.0                     |
|    | <b>Total</b> | <b>41/58</b>  | <b>70.7<sup>B</sup></b> | <b>29/162</b>    | <b>17.9<sup>A</sup></b> | <b>70/220</b> | <b>31.8<sup>B</sup></b> |

Values followed by the same letter on the line do not differ from each other by the chi-square test ( $p > 0.05$ )
